# Supplementary material for: Metabonomics Combined with UPLC-MS Chemical Profile for Discovery of Antidepressant Ingredients of a Traditional Chinese Medicines Formula, Chaihu-Shu-Gan-San
Source: Hindawi journal article supplement (doi:10.1155/2013/487158), 2013-01-01
Supplement: f2 [file 487158.f2.pdf]

**Table S1.** The antidepressant effects of CSGS and QZ extracts on CUMS treatedrats ( $\bar{x} \pm \text{S.E.M}$ ,  $n = 8$ )

| Group                         | Body weight (g) |                            | Open-field test (OFT) |                         | Sucrose consumption (g) |                    |
|-------------------------------|-----------------|----------------------------|-----------------------|-------------------------|-------------------------|--------------------|
|                               | 0W              | 4W                         | 0W                    | 4W                      | 0W                      | 4W                 |
| Control                       | 186.78±10.57    | 235.65±12.37               | 85.6±9.82             | 81.1±8.43               | 17.2                    | 17.1               |
| CUMS <sup>a</sup>             | 199.16±16.34    | 93.12±6.89 <sup>**</sup>   | 76.5±7.92             | 42.0±8.31 <sup>**</sup> | 16.7                    | 8.4 <sup>**</sup>  |
| Positive control <sup>b</sup> | 191.702±15.02   | 144.342±17.21 <sup>*</sup> | 81.7±9.84             | 61.4±7.82 <sup>*</sup>  | 15.8                    | 17.5 <sup>*</sup>  |
| CSGS <sup>b</sup>             | 189.08±11.46    | 150.522±14.14 <sup>*</sup> | 69.6±7.43             | 72.43±9.82              | 16.5                    | 17.3               |
| QZ <sup>b</sup>               | 188.71±13.71    | 147.16±14.48 <sup>*</sup>  | 75.2±6.73             | 65.4±5.53               | 17.6                    | 21.7 <sup>**</sup> |

<sup>a</sup> **\*\***  $p < 0.01$  vs control group, **\***  $p < 0.05$  vs control group<sup>b</sup> **\*\***  $p < 0.01$  vs CUMS group, **\***  $p < 0.05$  vs CUMS group

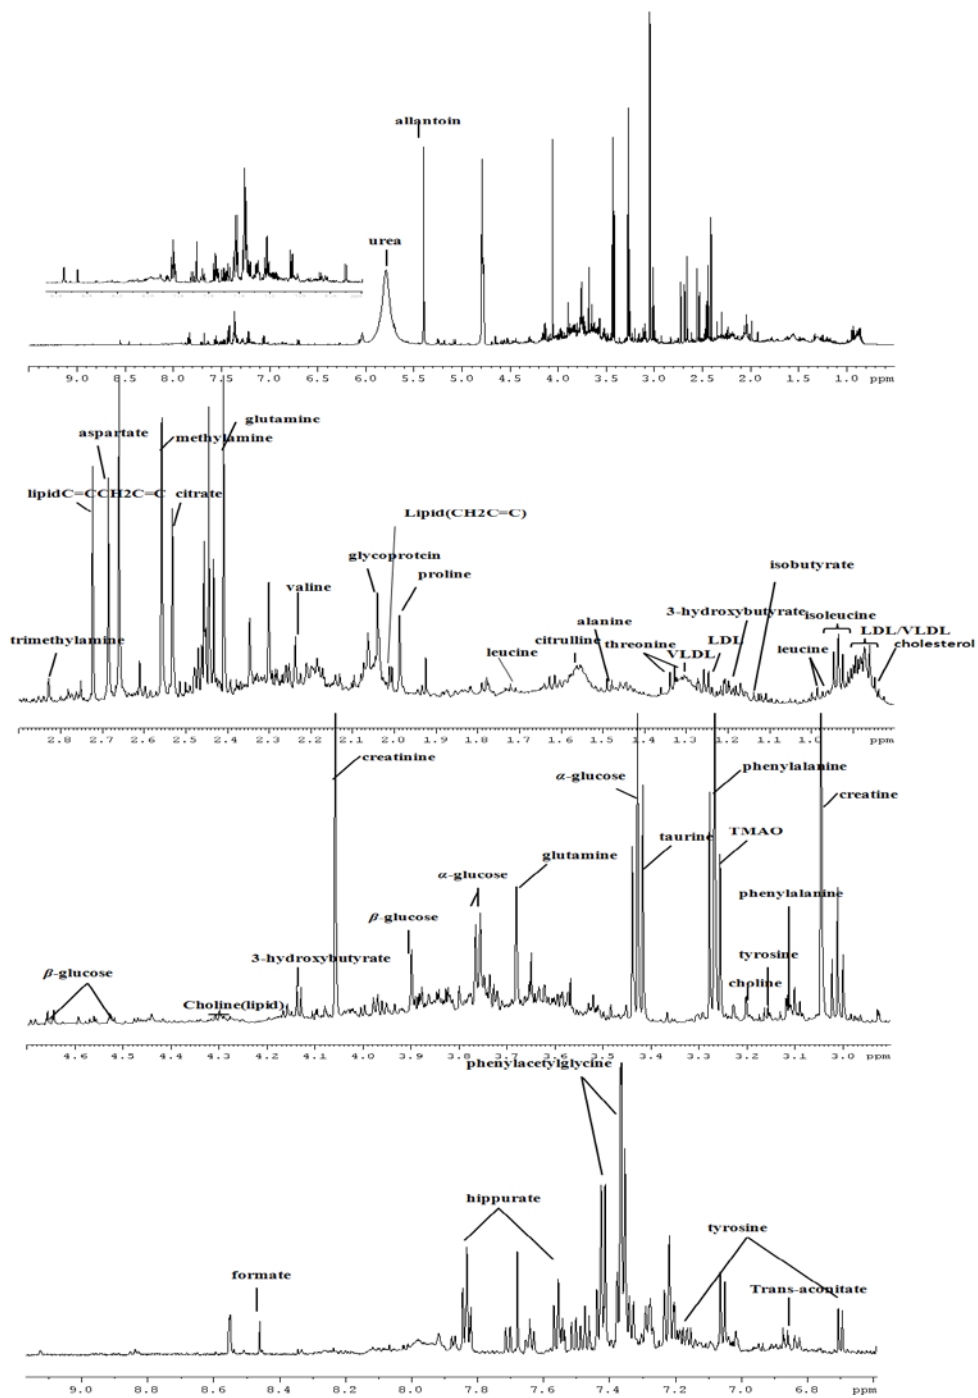

Figure S1. Typical  $^1\text{H}$  NMR spectrum of a urine sample of rats in control group.

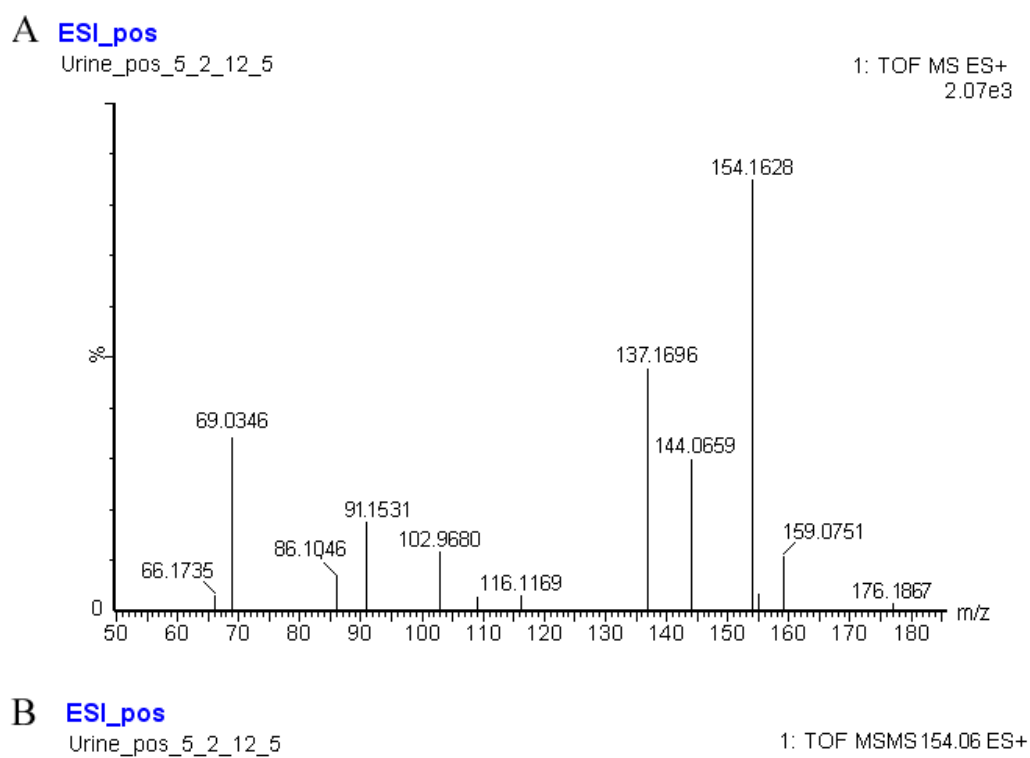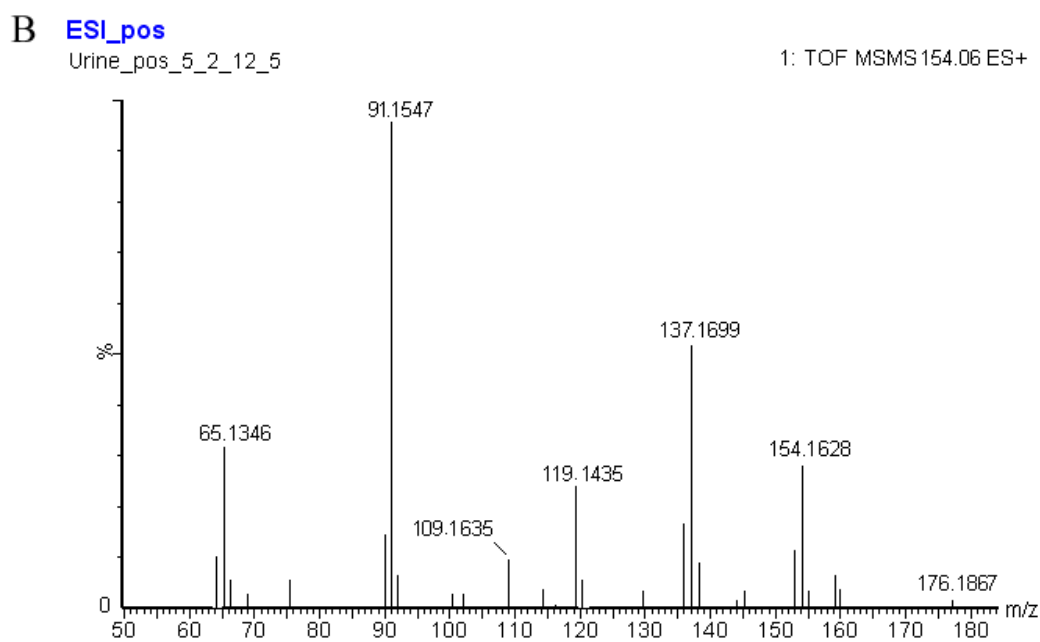

Figure S2: (A) Full-scan mass spectrum of the peak  $m/z$  154.1628 at 1.07 minute in positive ion mode, (B)  $MS^2$  spectrum of ion at  $m/z$  154.1628 in positive ion mode.

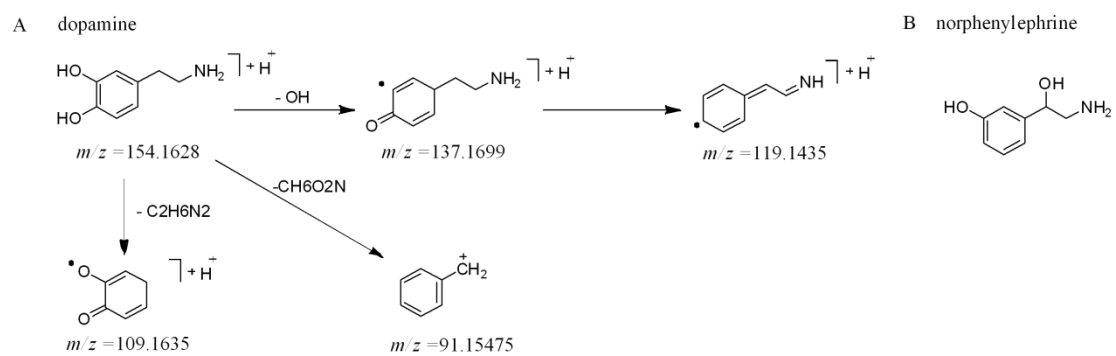

Figure S3: A, Fragmentation pathway of dopamine in positive ion mode. B. The structure of norphenylephrine.

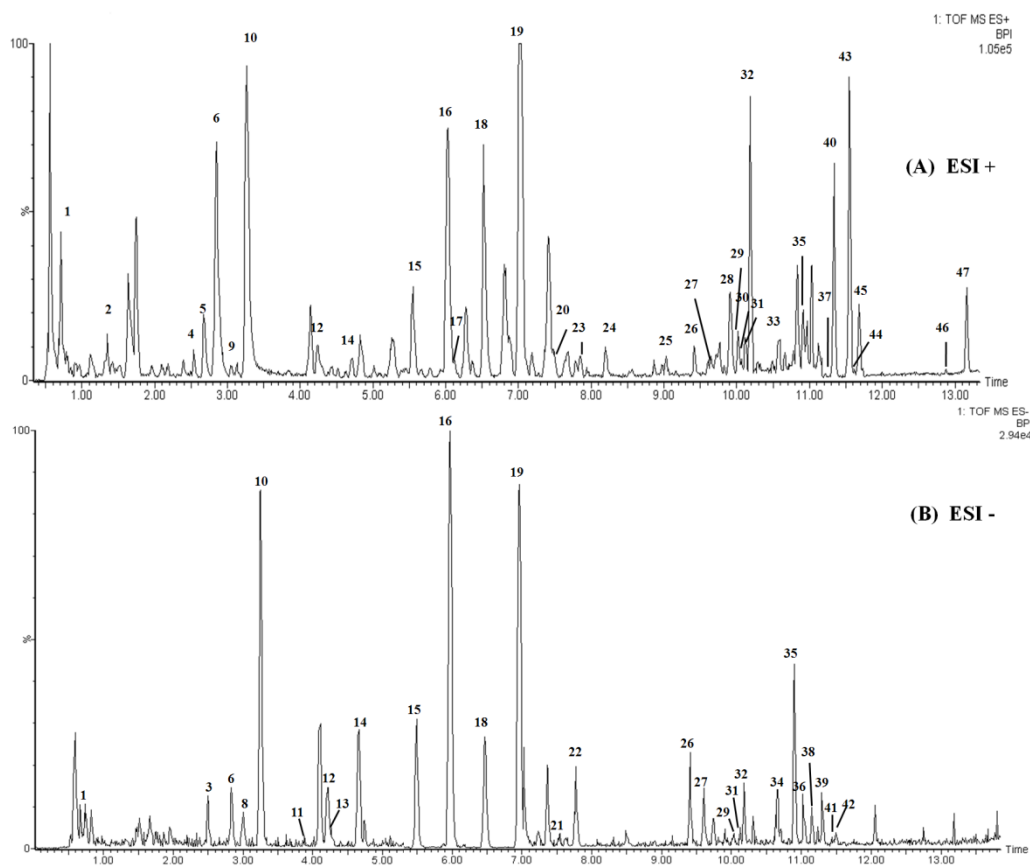

Figure S4: The **chemical** profiles of CSGS extract by UPLC-Q-TOF/MS in **positive ESI mode (A)** and **negative ESI mode (B)**.

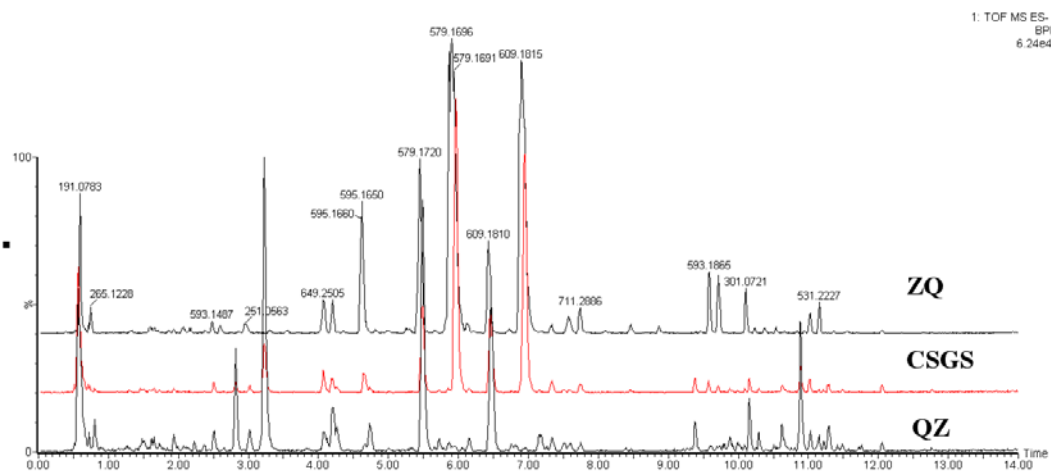

Figure S5: The BPI chromatograms of the extracts of CSGS, QZ and Zhi-Qiao in negative mode.
